# Supplementary material for: EE triple bonds (E = Group 13) promoted by charge transfer from alkali metals
Source: Royal Society of Chemistry journal article supplement (doi:10.1039/d1nj03611d), 2021-01-01
Supplement: d1nj03611d1.pdf [file d1nj03611d1.pdf]

**Supporting Information for**  
**The E≡E Triple Bonds (E = Group 13) Promoted by Charge**  
**Transfer From Alkali Metals**

Yu-qian Liu,<sup>a</sup> Meng-hui Wang,<sup>a</sup> Runfeng Huang,<sup>b</sup> Lili Zhao,<sup>\*b</sup> Zhong-hua Cui<sup>\*ac</sup>

*<sup>a</sup>Institute of Atomic and Molecular Physics, Key Laboratory of Physics and Technology for Advanced Batteries (Ministry of Education), Jilin University, Changchun, China*

*E-mail: zcui@jlu.edu.cn*

*<sup>b</sup>Institute of Advanced Synthesis, School of Chemistry and Molecular Engineering, Nanjing Tech University, Nanjing, China*

*E-mail: ias\_llzhao@njtech.edu.cn*

*<sup>c</sup>Beijing National Laboratory for Molecular Sciences*

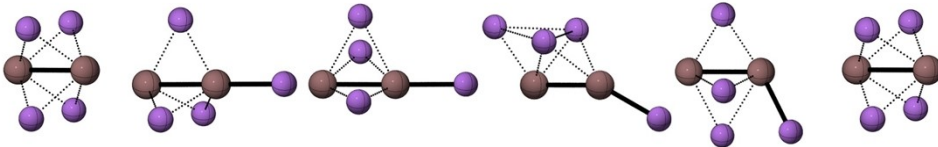

|      | I ( $D_{4h} \ ^1A_{1g}$ ) | II ( $C_{3v} \ ^1A_1$ ) | III ( $C_s \ ^1A'$ ) | IV ( $C_s \ ^1A'$ ) | V ( $C_s \ ^3A'$ ) | VI ( $D_{4h} \ ^3A_{1g}$ ) |
|------|---------------------------|-------------------------|----------------------|---------------------|--------------------|----------------------------|
| E=B  | 0.0                       | 1.1                     | —                    | —                   | 22.0               | 22.7                       |
| E=Al | 0.0                       | 2.2                     | 2.7                  | 7.0                 | 13.4               | 17.9*                      |
| E=Ga | 0.0                       | 1.8                     | 2.8                  | 7.5                 | 14.0               | 7.9*                       |
| E=In | 1.7                       | 0.02                    | 0.0                  | 4.8                 | 10.4               | 4.3*                       |
| E=Tl | 4.8                       | 1.5                     | 0.0                  | —                   | 10.4               | 3.1*                       |

**Figure S1.** The low-lying energy isomers of  $E_2Na_4$  are obtained at the PBE0/def2-TZVP level, and their relative energies in kcal/mol are computed at the CCSD(T)/def2-TZVP//PBE0/def2-TZVP level and corrected by zero-point corrections of PBE0/def2-TZVP. The point group and spectroscopic states were given in parenthesis. “—” represents that the structure does not exist. \*Lower symmetry compared to  $D_{4h}$ .

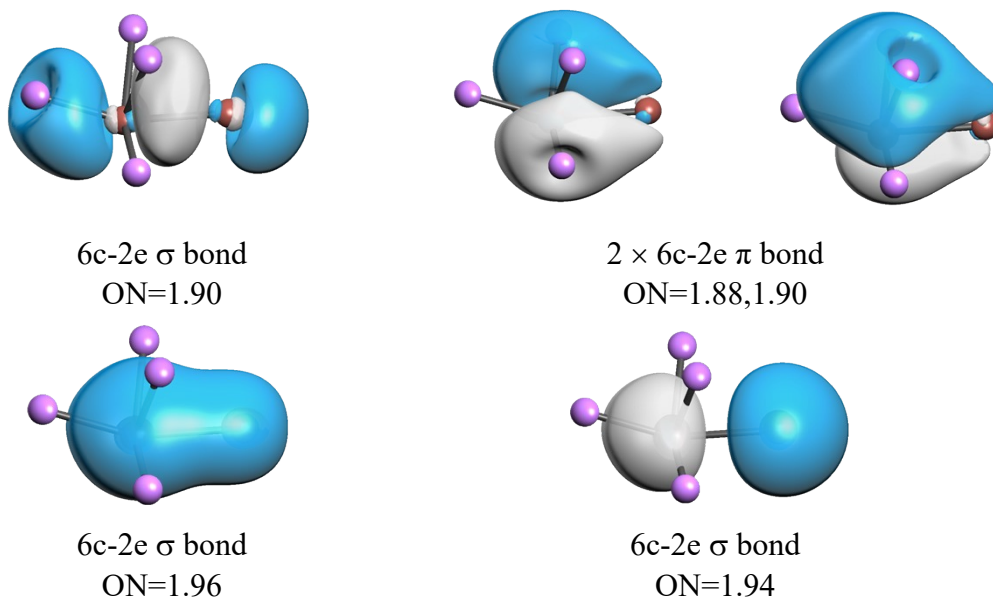

**Figure S2.** AdNDP of  $C_s$  symmetry global minimum  $Tl_2Li_4$  (**II**) computed at the CCSD/def2-TZVP level. ON refers to the occupation number.

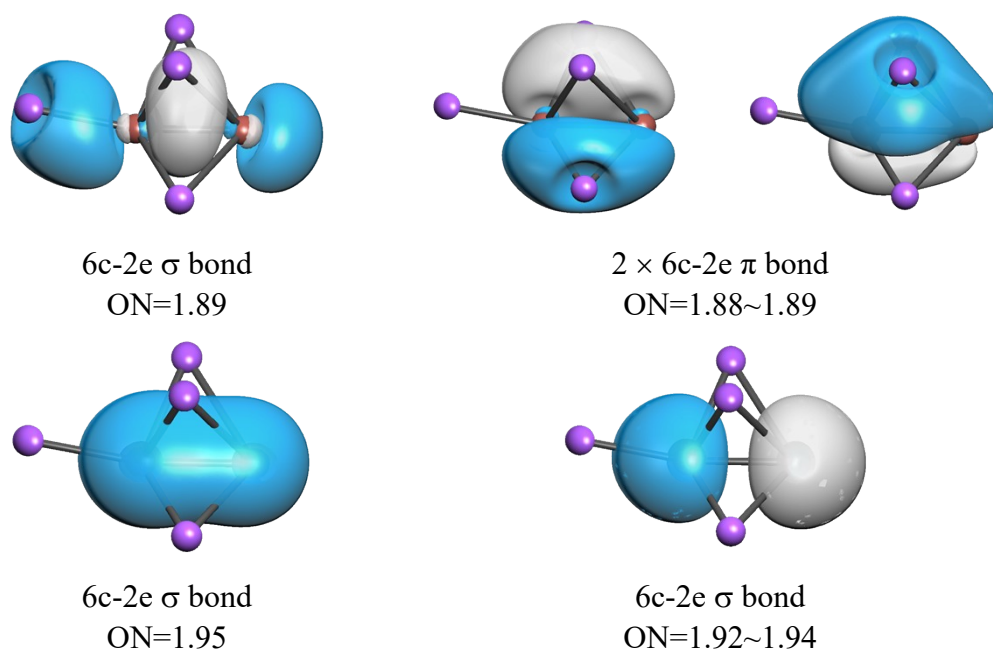

**Figure S3.** AdNDP of  $C_s$  symmetry global minimum  $Tl_2Na_4$  (**III**) computed at the CCSD/def2-TZVP level. ON refers to the occupation number.

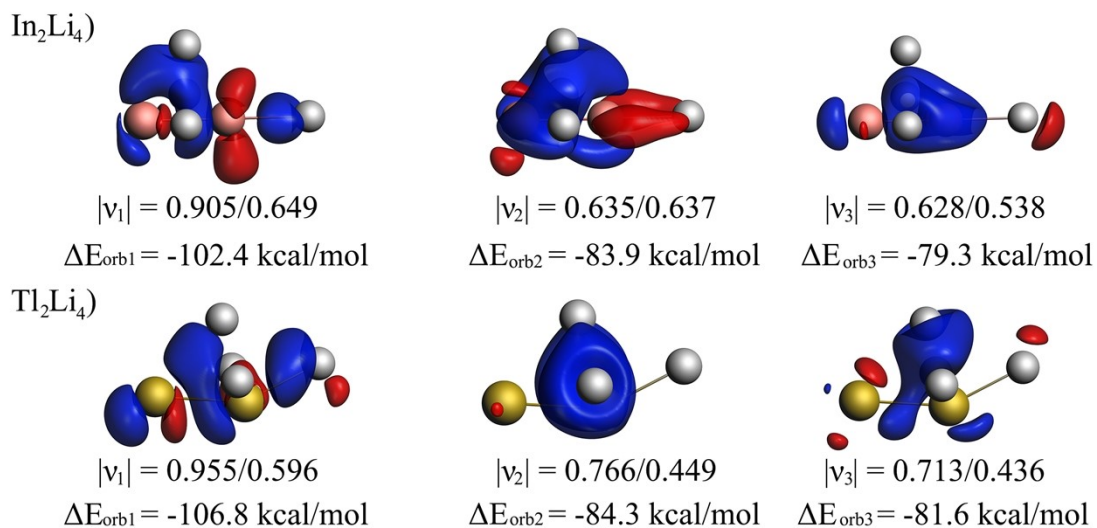

**Figure S4.** Plot of deformation densities  $\Delta\rho_{1-3}$  of the pairwise orbital interactions among  $E^{2-}$  (Quartet),  $ELi$  (Quartet),  $Li_3^{3+}$  (Singlet) fragments in  $E_2Li_4$  ( $E = \text{In, Tl}$ ), associated interaction energies  $\Delta E_{\text{orb}}$  (in kcal/mol) and eigenvalues  $v$  and the alpha and beta eigenvalues are given in before and after slash. The eigenvalues  $v$  indicate the size of the charge flow, and the direction of charge flow is red→blue.

**Table S1.** EDA-NOCV results of  $E_2Li_4$  using the interacting fragments (two  $E^{2-}$  and one  $Li_4^{4+}$ ) at the BP86/TZ2P level of theory. Energy values are given in kcal/mol.

|                              | $E^{2-}$ (Doublet) + $E^{2-}$ (Doublet) + $Li_4^{4+}$ (Singlet) |                    |                    |                    |                    |
|------------------------------|-----------------------------------------------------------------|--------------------|--------------------|--------------------|--------------------|
|                              | E = B                                                           | E = Al             | E = Ga             | E = In             | E = Tl             |
| $\Delta E_{int}$             | -1682.6                                                         | -1352.9            | -1368.8            | -1311.1            | -1301.0            |
| $\Delta E_{Pauli}$           | 796.1                                                           | 401.3              | 475.6              | 441.0              | 413.5              |
| $\Delta E_{elstat}^{[a]}$    | -1954.9<br>(78.9%)                                              | -1381.4<br>(78.7%) | -1466.8<br>(79.5%) | -1372.1<br>(78.4%) | -1340.7<br>(78.2%) |
| $\Delta E_{orb}^{[a]}$       | -523.8 (21.1%)                                                  | -372.6 (21.3%)     | -377.5 (19.5%)     | -380.0 (21.6%)     | -373.7 (21.8%)     |
| $\Delta E_{orb1}^{[b]}$      | -327.2 (62.5%)                                                  | -149.3 (40.1%)     | -174.0 (46.1%)     | -143.1 (37.7%)     | -153.9 (41.2%)     |
| $\Delta E_{orb2}^{[b]}$      | -92.9 (17.7%)                                                   | -113.6 (30.5%)     | -92.9 (24.6%)      | -133.6 (35.2%)     | -106.2 (28.4%)     |
| $\Delta E_{orb3}^{[b]}$      | -63.4 (12.1%)                                                   | -96.3 (25.8%)      | -91.1 (24.1%)      | -88.3 (23.2%)      | -97.7 (26.1%)      |
| $\Delta E_{orb(rest)}^{[b]}$ | -40.2 (7.7%)                                                    | -13.7 (3.6%)       | -19.8 (5.2%)       | -15.6 (4.0%)       | -16.8 (4.4%)       |

<sup>a</sup>The values in parentheses give the percentage contribution to the total attractive

interactions  $\Delta E_{elstat} + \Delta E_{orb}$

<sup>b</sup>The values in parentheses give the percentage contribution to the total orbital

interactions  $\Delta E_{orb}$

**Table S2.** EDA-NOCV results of  $E_2Li_4$  using the interacting fragments (two  $E^{2-}$  and one  $Li_4^{4+}$ ) at the PBE0/TZ2P level of theory. Energy values are given in kcal/mol.

|                                            | $E^{2-}$ (Quartet) + $E^{2-}$ (Quartet) + $Li_4^{4+}$ (Singlet) |                    |                    |                    |                    |
|--------------------------------------------|-----------------------------------------------------------------|--------------------|--------------------|--------------------|--------------------|
|                                            | E = B                                                           | E = Al             | E = Ga             | E = In             | E = Tl             |
| $\Delta E_{\text{int}}$                    | -1673.5                                                         | -1359.6            | -1372.8            | -1317.2            | -1306.3            |
| $\Delta E_{\text{Pauli}}$                  | 718.6                                                           | 402.3              | 463.0              | 419.2              | 400.8              |
| $\Delta E_{\text{elstat}}^{\text{[a]}}$    | -1960.2<br>(81.9%)                                              | -1408.8<br>(80.0%) | -1487.2<br>(81.0%) | -1398.0<br>(80.5%) | -1360.2<br>(79.7%) |
| $\Delta E_{\text{orb}}^{\text{[a]}}$       | -431.9 (18.1%)                                                  | -353.0 (20.0%)     | -348.6 (19.0%)     | -338.4 (19.5%)     | -346.9 (20.3%)     |
| $\Delta E_{\text{orb1}}^{\text{[b]}}$      | -253.7 (58.7%)                                                  | -149.3 (42.3%)     | -145.9 (41.9%)     | -134.0 (39.6%)     | -130.9 (37.7%)     |
| $\Delta E_{\text{orb2}}^{\text{[b]}}$      | -71.3 (16.5%)                                                   | -95.5 (27.1%)      | -93.6 (26.8%)      | -95.6 (28.2%)      | -100.8 (29.1%)     |
| $\Delta E_{\text{orb3}}^{\text{[b]}}$      | -71.3 (16.5%)                                                   | -95.5 (27.1%)      | -93.6 (26.8%)      | -95.6 (28.2%)      | -100.8 (29.1%)     |
| $\Delta E_{\text{orb(rest)}}^{\text{[b]}}$ | -35.6 (8.3%)                                                    | -12.8 (3.6%)       | -15.6 (4.5%)       | -13.5 (4.0%)       | -14.4 (4.2%)       |

<sup>a</sup>The values in parentheses give the percentage contribution to the total attractive interactions  $\Delta E_{\text{elstat}} + \Delta E_{\text{orb}}$ .

<sup>b</sup>The values in parentheses give the percentage contribution to the total orbital interactions  $\Delta E_{\text{orb}}$ .

**Table S3.** EDA-NOCV results of  $E_2Li_4$  using the interacting fragments (two  $E^{2-}$  and one  $Li_4^{4+}$ ) at the PBE0/TZ2P level of theory. Energy values are given in kcal/mol.

|                                            | $E^{2-}$ (Doublet) + $E^{2-}$ (Doublet) + $Li_4^{4+}$ (Singlet) |                    |                    |                    |                    |
|--------------------------------------------|-----------------------------------------------------------------|--------------------|--------------------|--------------------|--------------------|
|                                            | E=B                                                             | E=Al               | E=Ga               | E=In               | E=Tl               |
| $\Delta E_{\text{int}}$                    | -1709.0                                                         | -1388.5            | -1401.9            | -1343.3            | -1323.0            |
| $\Delta E_{\text{Pauli}}$                  | 836.7                                                           | 395.6              | 423.0              | 401.4              | 401.7              |
| $\Delta E_{\text{elstat}}^{\text{[a]}}$    | -1980.6<br>(77.8%)                                              | -1398.1<br>(77.9%) | -1424.9<br>(78.1%) | -1351.9<br>(77.5%) | -1341.8<br>(77.8%) |
| $\Delta E_{\text{orb}}^{\text{[a]}}$       | -565.3 (22.2%)                                                  | -386.0 (22.1%)     | -399.9 (21.9%)     | -392.8 (22.5%)     | -383.0 (22.2%)     |
| $\Delta E_{\text{orb1}}^{\text{[b]}}$      | -351.9 (62.3%)                                                  | -142.2 (36.8%)     | -157.4 (39.4%)     | -156.7 (39.9%)     | -162.9 (42.5%)     |
| $\Delta E_{\text{orb2}}^{\text{[b]}}$      | -105.2 (18.6%)                                                  | -118.3 (30.7%)     | -135.5 (33.9%)     | -125.7 (32.0%)     | -102.8 (26.8%)     |
| $\Delta E_{\text{orb3}}^{\text{[b]}}$      | -74.8 (13.2%)                                                   | -112.6 (29.2%)     | -90.6 (22.7%)      | -94.7 (24.1%)      | -98.6 (25.7%)      |
| $\Delta E_{\text{orb(rest)}}^{\text{[b]}}$ | -33.4 (5.9%)                                                    | -13.0 (3.4%)       | -15.6 (4.0%)       | -16.2 (4.1%)       | -18.7 (4.9%)       |

<sup>a</sup>The values in parentheses give the percentage contribution to the total attractive interactions  $\Delta E_{\text{elstat}} + \Delta E_{\text{orb}}$ .

<sup>b</sup>The values in parentheses give the percentage contribution to the total orbital interactions  $\Delta E_{\text{orb}}$ .



**Table S4.** EDA-NOCV results of  $E_2Li_4$  using the interacting fragments (one  $E^{2-}$ , one  $ELi^-$  and one  $Li_3^{3+}$ ) at the BP86/TZ2P level of theory. Energy values are given in kcal/mol.

|                              | $E^{2-}$ (Doublet) + $ELi^-$ (Doublet) + $Li_3^{3+}$ (Singlet) |                |
|------------------------------|----------------------------------------------------------------|----------------|
|                              | E = In                                                         | E = Tl         |
| $\Delta E_{int}$             | -836.5                                                         | -836.6         |
| $\Delta E_{Pauli}$           | 335.6                                                          | 276.5          |
| $\Delta E_{elstat}^{[a]}$    | -841.0 (71.8%)                                                 | -800.1 (71.9%) |
| $\Delta E_{orb}^{[a]}$       | -331.0 (28.2%)                                                 | -312.9 (28.1%) |
| $\Delta E_{orb1}^{[b]}$      | -173.0 (52.3%)                                                 | -169.9 (54.3%) |
| $\Delta E_{orb2}^{[b]}$      | -78.0 (23.5%)                                                  | -83.1 (26.5%)  |
| $\Delta E_{orb3}^{[b]}$      | -66.8 (20.2%)                                                  | -48.1 (15.4%)  |
| $\Delta E_{orb(rest)}^{[b]}$ | -13.8 (4.1%)                                                   | -12.5 (3.9%)   |

<sup>a</sup>The values in parentheses give the percentage contribution to the total attractive interactions  $\Delta E_{elstat} + \Delta E_{orb}$

<sup>b</sup>The values in parentheses give the percentage contribution to the total orbital interactions  $\Delta E_{orb}$

**Table S5.** Smallest frequencies ( $V_{\min}$ ,  $\text{cm}^{-1}$ ), NPA charges ( $Q$ ,  $|e|$ ), Bonding properties ( $B$ , Wiberg bond index (WBI) in parenthesis and bond distances ( $\text{\AA}$ )) of the  $D_{4h}$  symmetry  $E_2Na_4$  obtained at the CCSD/def2-TZVP level.

| $E_2Na_4$ | $V_{\min}$ | $Q_E$ | $Q_{Na}$ | $B_{E-E}$    | $B_{E-Na}$   | $B_{Na-Na}$  |
|-----------|------------|-------|----------|--------------|--------------|--------------|
| E=B       | 48.3       | -1.26 | 0.63     | 1.561 (2.64) | 2.601 (0.17) | 3.508 (0.08) |
| E=Al      | 54.0       | -1.12 | 0.56     | 2.472 (2.15) | 3.081 (0.22) | 3.991 (0.07) |
| E=Ga      | 55.1       | -1.07 | 0.54     | 2.391 (2.15) | 3.034 (0.22) | 3.943 (0.08) |
| E=In      | 41.2       | -1.21 | 0.60     | 2.736 (2.22) | 3.183 (0.20) | 4.065 (0.07) |
| E=Tl      | 34.8       | -1.04 | 0.52     | 3.757 (1.18) | 3.262 (0.28) | 3.771 (0.03) |

**Table S6.** Vibrational spectrum of B<sub>2</sub>Li<sub>4</sub> calculated by PBE0/def2-TZVP and CCSD(T)/def2-TZVP (in parenthesis).

| Frequency, cm <sup>-1</sup> | IR intensities (KM/Mole), |
|-----------------------------|---------------------------|
| 148.4461(141.9035)          | 0.0000(0.0000)            |
| 226.2009(219.0153)          | 0.2196(0.0000)            |
| 226.2009(219.0167)          | 0.2196(0.0000)            |
| 254.1325(247.6765)          | 90.1915(0.0000)           |
| 270.8825(266.8881)          | 0.0000(0.0000)            |
| 340.2450(344.2427)          | 0.0000(0.0000)            |
| 340.2450(344.2429)          | 0.0000(0.0000)            |
| 450.9756(431.0406)          | 0.0000(0.0000)            |
| 466.3722(449.6721)          | 0.0000(0.0000)            |
| 558.9979(543.8807)          | 264.8556(0.0000)          |
| 558.9979(543.8813)          | 264.8556(0.0000)          |
| 1190.6582(1154.2719)        | 0.0000(0.0000)            |

**Table S7.** Vibrational spectrum of Al<sub>2</sub>Li<sub>4</sub> calculated by PBE0/def2-TZVP and CCSD(T)/def2-TZVP (in parenthesis).

| Frequency, cm <sup>-1</sup> | IR intensities (KM/Mole), |
|-----------------------------|---------------------------|
| 116.6634(116.5702)          | 0.1557(0.0000)            |
| 116.6634(116.5711)          | 0.1557(0.0000)            |
| 162.3540(158.7801)          | 0.0000(0.0000)            |
| 167.6475(160.3224)          | 0.0000(0.0000)            |
| 173.3738(175.6397)          | 0.0000(0.0000)            |
| 173.3739(195.9869)          | 0.0000(0.0000)            |
| 178.0446(195.9875)          | 2.8691(0.0000)            |
| 296.6174(290.4548)          | 0.0000(0.0000)            |
| 350.5615(331.7219)          | 0.0000(0.0000)            |
| 362.9617(356.0872)          | 176.0876(0.0000)          |
| 362.9617(356.0872)          | 176.0876(0.0000)          |
| 397.1194(391.7274)          | 0.0000(0.0000)            |

**Table S8.** Vibrational spectrum of Ga<sub>2</sub>Li<sub>4</sub> calculated by PBE0/def2-TZVP and CCSD(T)/def2-TZVP (in parenthesis).

| Frequency, cm <sup>-1</sup> | IR intensities (KM/Mole), |
|-----------------------------|---------------------------|
| 119.4709(122.3917)          | 0.1042(0.0000)            |
| 119.4709(122.4072)          | 0.1042(0.0000)            |
| 134.1475(140.3968)          | 0.0000(0.0000)            |
| 134.1475(150.3889)          | 0.0000(0.0000)            |
| 134.9629(155.3284)          | 0.3210(0.0000)            |
| 158.1822(155.3492)          | 0.0000(0.0000)            |
| 171.1501(169.5822)          | 0.0000(0.0000)            |
| 214.9063(230.0906)          | 0.0000(0.0000)            |
| 341.5126(333.1456)          | 142.6419(0.0000)          |
| 341.5126(338.0040)          | 142.6419(0.0000)          |
| 349.0849(338.0066)          | 0.0000(0.0000)            |
| 357.0215(347.2164)          | 0.0000(0.0000)            |

**Table S9.** Vibrational spectrum of  $\text{In}_2\text{Li}_4$  calculated by PBE0/def2-TZVP and CCSD(T)/def2-TZVP (in parenthesis).

| Frequency, $\text{cm}^{-1}$ | IR intensities (KM/Mole), |
|-----------------------------|---------------------------|
| 92.2437(97.7062)            | 0.0000(0.0000)            |
| 92.2437(97.7158)            | 0.0000(0.0000)            |
| 95.6407(121.9416)           | 0.0000(0.0000)            |
| 101.6047(135.5019)          | 0.0267(0.0000)            |
| 101.6048(137.4641)          | 0.0267(0.0000)            |
| 127.5439(137.4738)          | 0.0029(0.0000)            |
| 162.7177(150.7678)          | 0.0000(0.0000)            |
| 186.0464(167.6527)          | 0.0000(0.0000)            |
| 314.7260(310.9896)          | 107.1652(0.0000)          |
| 314.7260(310.9912)          | 107.1653(0.0000)          |
| 334.0436(314.7015)          | 0.0000(0.0000)            |
| 340.5494(324.2662)          | 0.0000(0.0000)            |

**Table S10.** Vibrational spectrum of  $\text{Tl}_2\text{Li}_4$  calculated by PBE0/def2-TZVP and CCSD(T)/def2-TZVP (in parenthesis).

| Frequency, $\text{cm}^{-1}$ | IR intensities (KM/Mole), |
|-----------------------------|---------------------------|
| 41.3281(45.3668)            | 0.0000(0.0000)            |
| 83.2822(97.9906)            | 1.2871(0.0000)            |
| 130.8934(98.0017)           | 0.3924(0.0000)            |
| 130.8934(108.2840)          | 0.3924(0.0000)            |
| 160.6110(108.3016)          | 0.0000(0.0000)            |
| 179.4269(111.4199)          | 0.0000(0.0000)            |
| 179.4269(143.0439)          | 0.0000(0.0000)            |
| 228.6324(190.4997)          | 0.0000(0.0000)            |
| 232.5106(299.7020)          | 0.0000(0.0000)            |
| 258.3857(299.7044)          | 36.8665(0.0000)           |
| 258.3857(305.2934)          | 36.8666(0.0000)           |
| 264.9977(313.0689)          | 0.0000(0.0000)            |

## II. Coordinates obtained at the CCSD(T)/def2-TZVP level.

### I-B<sub>2</sub>Li<sub>4</sub>

|   |              |              |              |
|---|--------------|--------------|--------------|
| 5 | 0.000000000  | 0.000000000  | 0.772029000  |
| 5 | 0.000000000  | 0.000000000  | -0.772029000 |
| 3 | 0.000000000  | 2.078571000  | 0.000000000  |
| 3 | 2.078571000  | 0.000000000  | 0.000000000  |
| 3 | 0.000000000  | -2.078571000 | 0.000000000  |
| 3 | -2.078571000 | 0.000000000  | 0.000000000  |

### I-Al<sub>2</sub>Li<sub>4</sub>

|    |              |              |              |
|----|--------------|--------------|--------------|
| 13 | 0.000000000  | 0.000000000  | 1.250270000  |
| 13 | 0.000000000  | 0.000000000  | -1.250270000 |
| 3  | 0.000000000  | 2.396899000  | 0.000000000  |
| 3  | 2.396899000  | 0.000000000  | 0.000000000  |
| 3  | 0.000000000  | -2.396899000 | 0.000000000  |
| 3  | -2.396899000 | 0.000000000  | 0.000000000  |

### I-Ga<sub>2</sub>Li<sub>4</sub>

|    |              |              |              |
|----|--------------|--------------|--------------|
| 31 | 0.000000000  | 0.000000000  | 1.204830000  |
| 31 | 0.000000000  | 0.000000000  | -1.204830000 |
| 3  | 0.000000000  | 2.366619000  | 0.000000000  |
| 3  | 2.366619000  | 0.000000000  | 0.000000000  |
| 3  | 0.000000000  | -2.366619000 | 0.000000000  |
| 3  | -2.366619000 | 0.000000000  | 0.000000000  |

### I-In<sub>2</sub>Li<sub>4</sub>

|    |              |              |              |
|----|--------------|--------------|--------------|
| 49 | 0.000000000  | 0.000000000  | 1.405634000  |
| 49 | 0.000000000  | 0.000000000  | -1.405634000 |
| 3  | 1.719015000  | -1.719015000 | 0.000000000  |
| 3  | -1.719015000 | -1.719015000 | 0.000000000  |
| 3  | -1.719015000 | 1.719015000  | 0.000000000  |
| 3  | 1.719015000  | 1.719015000  | 0.000000000  |

### I-Tl<sub>2</sub>Li<sub>4</sub>

|    |              |              |              |
|----|--------------|--------------|--------------|
| 81 | 0.000000000  | 0.000000000  | 1.456532000  |
| 81 | 0.000000000  | 0.000000000  | -1.456532000 |
| 3  | 1.694921000  | -1.694921000 | 0.000000000  |
| 3  | -1.694921000 | -1.694921000 | 0.000000000  |
| 3  | -1.694921000 | 1.694921000  | 0.000000000  |
| 3  | 1.694921000  | 1.694921000  | 0.000000000  |

### II-In<sub>2</sub>Li<sub>4</sub>

|    |             |             |             |
|----|-------------|-------------|-------------|
| 49 | 0.383635000 | 1.234226000 | 0.000000000 |
|----|-------------|-------------|-------------|



|    |              |              |              |
|----|--------------|--------------|--------------|
| 49 | -0.265487000 | -1.498422000 | 0.000000000  |
| 3  | 0.990204000  | 3.887718000  | 0.000000000  |
| 3  | -2.388986000 | 0.496973000  | 0.000000000  |
| 3  | -0.265487000 | -0.034741000 | 2.418032000  |
| 3  | -0.265487000 | -0.034741000 | -2.418032000 |

### III-Tl<sub>2</sub>Li<sub>4</sub>

|    |              |              |              |
|----|--------------|--------------|--------------|
| 81 | 0.357924000  | 1.293919000  | 0.000000000  |
| 81 | -0.209082000 | -1.551049000 | 0.000000000  |
| 3  | -0.541112000 | 3.831285000  | 0.000000000  |
| 3  | -2.395402000 | 0.934680000  | 0.000000000  |
| 3  | -0.541112000 | 1.088271000  | 2.490134000  |
| 3  | -0.541112000 | 1.088271000  | -2.490134000 |

### I-B<sub>2</sub>Na<sub>4</sub>

|    |              |              |              |
|----|--------------|--------------|--------------|
| 5  | 0.000000000  | 0.000000000  | 0.780585000  |
| 5  | 0.000000000  | 0.000000000  | -0.780585000 |
| 11 | 0.000000000  | 2.480699000  | 0.000000000  |
| 11 | 2.480699000  | 0.000000000  | 0.000000000  |
| 11 | 0.000000000  | -2.480699000 | 0.000000000  |
| 11 | -2.480699000 | 0.000000000  | 0.000000000  |

### I-Al<sub>2</sub>Na<sub>4</sub>

|    |              |              |              |
|----|--------------|--------------|--------------|
| 13 | 0.000000000  | 0.000000000  | 1.235969000  |
| 13 | 0.000000000  | 0.000000000  | -1.235969000 |
| 11 | 0.000000000  | 2.821898000  | 0.000000000  |
| 11 | 2.821898000  | 0.000000000  | 0.000000000  |
| 11 | 0.000000000  | -2.821898000 | 0.000000000  |
| 11 | -2.821898000 | 0.000000000  | 0.000000000  |

### I-Ga<sub>2</sub>Na<sub>4</sub>

|    |              |              |              |
|----|--------------|--------------|--------------|
| 31 | 0.000000000  | 0.000000000  | 1.195345000  |
| 31 | 0.000000000  | 0.000000000  | -1.195345000 |
| 11 | 0.000000000  | 2.788275000  | 0.000000000  |
| 11 | 2.788275000  | 0.000000000  | 0.000000000  |
| 11 | 0.000000000  | -2.788275000 | 0.000000000  |
| 11 | -2.788275000 | 0.000000000  | 0.000000000  |

### I-In<sub>2</sub>Na<sub>4</sub>

|    |              |              |              |
|----|--------------|--------------|--------------|
| 49 | 0.000000000  | 0.000000000  | 1.367853000  |
| 49 | 0.000000000  | 0.000000000  | -1.367853000 |
| 11 | 2.032602000  | -2.032602000 | 0.000000000  |
| 11 | -2.032602000 | -2.032602000 | 0.000000000  |
| 11 | -2.032602000 | 2.032602000  | 0.000000000  |

|    |             |             |             |
|----|-------------|-------------|-------------|
| 11 | 2.032602000 | 2.032602000 | 0.000000000 |
|----|-------------|-------------|-------------|

**I-Tl<sub>2</sub>Na<sub>4</sub>**

|    |              |              |              |
|----|--------------|--------------|--------------|
| 81 | 0.000000000  | 0.000000000  | 1.878708000  |
| 81 | 0.000000000  | 0.000000000  | -1.878708000 |
| 11 | 1.885451000  | -1.885451000 | 0.000000000  |
| 11 | -1.885451000 | -1.885451000 | 0.000000000  |
| 11 | -1.885451000 | 1.885451000  | 0.000000000  |
| 11 | 1.885451000  | 1.885451000  | 0.000000000  |

**III-In<sub>2</sub>Na<sub>4</sub>**

|    |              |              |              |
|----|--------------|--------------|--------------|
| 49 | 0.615490000  | 0.892765000  | 0.000000000  |
| 49 | -0.236109000 | -1.794824000 | 0.000000000  |
| 11 | 1.350863000  | 3.844916000  | 0.000000000  |
| 11 | -2.568614000 | 0.598113000  | 0.000000000  |
| 11 | -0.236109000 | -0.212383000 | 2.792737000  |
| 11 | -0.236109000 | -0.212383000 | -2.792737000 |

**III-Tl<sub>2</sub>Na<sub>4</sub>**

|    |              |              |              |
|----|--------------|--------------|--------------|
| 81 | 0.704428000  | 0.972723000  | 0.000000000  |
| 81 | -0.395848000 | -1.717959000 | 0.000000000  |
| 11 | 0.985804000  | 3.993314000  | 0.000000000  |
| 11 | -2.466383000 | 1.153277000  | 0.000000000  |
| 11 | -0.395848000 | 0.170527000  | 2.775936000  |
| 11 | -0.395848000 | 0.170527000  | -2.775936000 |
